# Supplementary material for: Multifidelity Monte Carlo Estimation for Efficient Uncertainty Quantification in Climate-Related Modeling
Source: Copernicus journal article supplement (doi:10.5194/egusphere-2022-797), 2022-09-14
Supplement: Supplementary file [file egusphere-2022-797-AC2-supplement.pdf]

*- The three test-cases analysed appear to involve estimators evaluated after relatively short integration periods, and, rather than fully nonlinear flows/dynamics, the response of the system may be relatively linear over these short horizons as a result --- is this expected to influence the effectiveness of the MFMC results presented? For example, TC5 from Williamson does not become strongly nonlinear until approx. 20-days, with 50-days being the typical analysis window at which turbulence is fully developed. The SOMA case described in Wolfram (2015) is typically spun-up over several years, and then analysed over 30-day windows. In this work, it appears the TC5 case is analysed after 10 days, and the barotropic-gyre-version-of-SOMA after 3-days (restarted from a 15-day spin-up). Are the MFMC results robust when the duration/nonlinearity of the test-cases is increased?*

Based on our experience with prior work on MC-based estimation, we do not expect the linearity (or lack thereof) of the model solution to affect the performance of the MFMC estimation procedure.

*- Is it possible to estimate the relative "multi-fidelity" contributions to the accuracy of the MFMC estimator? For example, is the overall accuracy governed more by the small number of high resolution runs, the large number of low resolution runs, or something in-between? Considering the more linear (or at least non-turbulent) nature of solutions studied, how would a conventional MC estimator compare if run only using lower-resolution simulations? In other words, is the good performance of the MFMC method due to the solution being well-resolved even on the coarser meshes, or is the multi-resolution hierarchy effective in estimating behaviour resolvable only at high-resolution? If it is the former, I wonder whether the problems studied are sufficiently nonlinear at the grid-scale. If it is the latter, this may be a nice result to highlight further.*

A goal of MFMC estimation is to achieve (using very few samples of the high-fidelity model) the same accuracy as obtained by an MC estimator (that exclusively uses many samples of that model). Certainly, at least one high-fidelity model evaluation is necessary to eliminate bias in the MFMC estimator. Moreover, we find practically that the high-fidelity samples used to "steer" this estimator in an accurate direction, while the low-fidelity samples are used to shrink its variance around the true solution. Note that the dynamics of the example systems are not particularly well resolved by the low-fidelity models relative to the high-fidelity ones; particularly in the case of the barotropic gyre (SOMA) case, there is a noticeable visual difference between the 32km solution and the 8km solution.

*- I believe the gradient terms in the shallow-water system (12) should be  $\text{grad}(1/2*|u|^2) + g*\text{grad}(h + h_b)$  rather than the  $\text{grad}(\rho)$  included currently. Here  $p$*

*=  $\rho_0 * g * h$  is used to simplify the linear  $1/\rho_0 * \text{grad}(p)$  shallow-water pressure gradient, consistent with e.g. Ringler et al (2010).*

This has now been corrected. Thank you for your attention.

*- The SWE runtimes noted in 3.1.1 and 3.2.1 appear to be quite slow --- requiring 100's of seconds to advance a single time-step using relatively small  $O(\leq 100,000)$  cell meshes? Are these runtimes for the full multi-day simulations instead, or for all ensemble members perhaps?*

These were the wall-clock times observed when the relevant system was implemented in MATLAB and run on a 2015 MacBook laptop. Therefore, neither the implementation nor the hardware was optimized for computational efficiency.

*- While the MFMC methods presented here are clearly different in that they leverage varying resolution simulations, is it fair to compare against only the "historical" MC method, which is known to be uncompetitive in terms of efficiency? Significant work on alternative MC methods has been conducted by various authors in which a variety of accelerated techniques have been proposed. Are the large gains reported for MFMC expected to be replicated compared to e.g. MCMC (Markov Chain Monte Carlo) approaches more frequently used in climate model estimation?*

A primary benefit of MFMC over other modern estimation methods such as MCMC is its ability to leverage low-fidelity information to effect cost-savings without sacrificing estimator accuracy. In our experience with MFMC in other settings, this benefit translates to much larger cost savings for a given accuracy tolerance when compared to MCMC as well as other MC-related sampling schemes (e.g., variance reduction MC, importance sampling).

*Minor comments:*

*- The SOMA test case (Simulating Ocean Mesoscale Activity) typically refers to simulations using the multi-layer primitive equations, in which mesoscale eddies form due to 3d interactions between the momentum, density and forcing tendencies. In this shallow-water configuration with  $\rho = \text{const.}$ , it appears to be a wind-driven barotropic gyre that's studied instead, which is typically less turbulent, as per the smooth flow features in fig. 2. If so, it's suggested to label this test case as a wind-driven gyre.*

We agree with this reasoning and have changed the name globally throughout the manuscript.

*- Wallis (2012) reference appears to be missing.*

This has been fixed, thank you for your attention.

*- In 76: Is saying "no guesswork involved" too strong a statement? The systematic nature of the MFMC approach is attractive, but is it *\*the\** provably optimal sampling strategy, or more of an effective heuristic?*

It can be shown that the MFMC method presented here is the provably optimal solution (up to rounding) to a particular constrained optimization problem (see Gruber et al 2022, "A multifidelity Monte Carlo method for realistic computational budgets", for a formal statement). Therefore, we do not think it is a stretch to say there is "no guesswork involved" in this context.

*- In 72: ...also uses cheaper to obtain...*

*- fig. 3 labelling: left-right vs top-bottom.*

These have been fixed, thank you for your attention.

*- In 308: Is this an expression for the free surface height or the layer thickness ---  $h$  appears to be thickness in the shallow-water system (12).*

This is an expression for the fluid thickness. We have clarified this globally throughout the manuscript.

*- The Gruber (2022) paper referenced here appears to be an arXiv preprint, that in-turn references this GMD submission??*

This is true. The referenced preprint (to appear in J. Sci. Comput.) establishes the particular MFMC algorithm which has been applied to climate-related examples in this paper. Therefore, we refer interested readers to that manuscript for a more detailed description of the MFMC method. Conversely, we write in that preprint that "Forthcoming work will investigate applications of the present MFMC method to complex systems governed by partial differential equations, particularly in the context of climate modeling.", and provide an empty citation with title and relevant authors. The mentioned work has since become this GMD submission.

Since this has caused confusion, we intend to remove the offending citation from the J. Sci. Comput. paper during the proofing stage.
